# Effectiveness and Safety of Vedolizumab in Anti-TNF-Naïve Patients With Inflammatory Bowel Disease—A Multicenter Retrospective European Study

Uri Kopylov, MD,<sup>\*,a</sup> Bram Verstockt, MD,<sup>†,a</sup> Luc Biedermann, MD,<sup>‡</sup> Shaji Sebastian, MD,<sup>§</sup> Daniela Pugliese, MD,<sup>¶</sup> Elena Sonnenberg, MD,<sup>||</sup> Peter Steinhagen, MD,<sup>\*\*</sup> Naila Arebi, MD,<sup>††</sup> Yulia Ron, MD,<sup>‡‡</sup> Torsten Kucharzik, MD,<sup>§§</sup> Xavier Roblin, MD,<sup>¶¶</sup> Bella Ungar, MD,<sup>\*</sup> Ariella Bar-Gil Shitrit, MD,<sup>|||</sup> Sandro Ardizzone, MD,<sup>\*\*\*</sup> Pauliina Molander, MD,<sup>†††</sup> Marina Coletta, MD,<sup>†††</sup> Laurent Peyrin-Biroulet, MD,<sup>§§§</sup> Peter Bossuyt, MD,<sup>¶¶¶</sup> Irit Avni-Biron, MD,<sup>||||</sup> Emmanouela Tsoukali, MD,<sup>\*\*\*\*</sup> Mariangela Allocca, MD,<sup>†††</sup> Konstantinos Katsanos, MD,<sup>†††</sup> Tim Raine, MD,<sup>§§§§</sup> Taina Sipponen, MD,<sup>†††</sup> Gionata Fiorino, MD,<sup>¶¶¶¶</sup> Shomron Ben-Horin, MD,<sup>\*</sup> Rami Eliakim, MD,<sup>\*</sup> Alessandro Armuzzi, MD,<sup>¶</sup> Britta Siegmund, MD,<sup>||</sup> Daniel C. Baumgart, MD,<sup>\*\*</sup> Nikolaos Kamperidis, MD,<sup>††</sup> Nitsan Maharshak, MD,<sup>‡‡</sup> Christian Maaser, MD,<sup>§§</sup> Gerassimos Mantzaris, MD,<sup>\*\*\*\*</sup> Henit Yanai, MD,<sup>||||</sup> Dimitriou K. Christodoulou, MD,<sup>†††</sup> Iris Dotan, MD,<sup>||||,a</sup> and Marc Ferrante, MD<sup>†,a</sup>

Received for publications January 27, 2018; Editorial Decision March 4, 2018.

From the <sup>\*</sup>Sheba Medical Center, Gastroenterology, Tel Hashomer, and Sackler School of Medicine, Tel Aviv University, Israel; <sup>†</sup>Department of Gastroenterology and Hepatology, University Hospitals Leuven, KU Leuven, Leuven, Belgium; <sup>‡</sup>Division of Gastroenterology and Hepatology, University Hospital Zurich, Zurich, Switzerland; <sup>§</sup>IBD Unit, Hull & East Yorkshire Hospitals NHS Trust, Hull, United Kingdom; <sup>¶</sup>IBD Unit, Presidio Columbus Fondazione Policlinico Gemelli Università Cattolica, Rome, Italy; <sup>||</sup>Department of Medicine (Gastroenterology, Infectious Diseases, Rheumatology), Campus Benjamin Franklin, Charité-Universitätsmedizin, Berlin, Germany; <sup>\*\*</sup>Inflammatory Bowel Disease Center, Department of Gastroenterology and Hepatology, Charité Medical School, Humboldt-University of Berlin, Berlin, Germany; <sup>††</sup>Department of Inflammatory Bowel Disease, St Mark's Hospital, Harrow, London, United Kingdom; <sup>‡‡</sup>IBD Center, Department of Gastroenterology and Liver Diseases, Tel Aviv Sourasky Medical Center, and Sackler School of Medicine, Tel Aviv University, Tel Aviv, Israel; <sup>§§</sup>Department of Gastroenterology, Lüneburg Hospital, University of Hamburg, Lüneburg, Germany; <sup>¶¶</sup>CHU de Saint-Etienne, Gastroenterology, Saint Etienne, France; <sup>|||</sup>Shaare Zedek Medical Center, Digestive Diseases Institute, Jerusalem, Israel; <sup>\*\*\*</sup>Department of Gastroenterology, DIBIC, ASST Fatebenefratelli Sacco, Milan University, Milan, Italy; <sup>†††</sup>Department of Gastroenterology, Helsinki University Hospital and University of Helsinki, Helsinki, Finland; <sup>§§§</sup>Department of Pathophysiology and Transplantation, Gastroenterology and Endoscopy Unit, Fondazione IRCCS Ca' Granda Ospedale Maggiore Policlinico, Università degli Studi di Milano, Milan, Italy; <sup>¶¶¶</sup>Department of Hepatogastroenterology, Nancy University Hospital, Université de Lorraine, Vandoeuvre-lès-Nancy, France; <sup>¶¶¶¶</sup>Imelda GI Clinical Research Center, Gastroenterology, Bonheiden, Belgium; <sup>††††</sup>Division of Gastroenterology, Rabin Medical Center, Beilinson Campus, Petah Tikva, and Sackler School of Medicine, Tel Aviv University, Israel; <sup>†††††</sup>Department of Gastroenterology, "Evangelismos-Ophthalmiatreion Athinon-Polycliniki, Athens, Greece; <sup>†††††</sup>Gastroenterology, Humanitas Gradenigo, Turin, Italy; <sup>†††††</sup>Division of Gastroenterology, School of Health Sciences and University Hospital of Ioannina, Ioannina, Greece; <sup>§§§§</sup>Department of Medicine, Addenbrooke's Hospital, University of Cambridge, Cambridge, United Kingdom; <sup>§§§§§</sup>IBD Center, Department of Gastroenterology, Humanitas Research Hospital, Rozzano, Milan, Italy

<sup>a</sup>Equal contribution

Author disclosures are available in the Acknowledgments.

Conflicts of interest: U.K.: research support from Takeda, Medtronic; lecture fees/consultancy from Abbvie, Janssen, Takeda, CTS. B.V.: lecture fee from Ferring. L.B.: travel grants from MSD, Abbvie, and Vifor. Fees for consulting/advisory boards from MSD, Abbvie, Ferring, ThermoFisher, Takeda, Pfizer, Shire, Astellas, Janssen, and UCB. S.S.: research grants from Takeda, AbbVie, and Merck; speaker fees and advisory board honoraria from Merck, Janssen, Abbvie, Takeda, Pharmacosmos, Shiled, and Falk pharma. D.P.: lecture fees from Abbvie, MSD, and Takeda. T.K.: consultancy/lecture fees from Abbvie, Biogen, Celltrion, Falk Foundation, Ferring, Hospira, Janssen, MSD, Mundipharma, Takeda, UCB, and Wolff Pharma. X.R.: speaker fees from MSD, Abbvie, Takeda, Theradiag, and Janssen; advisory board member for MSD, Takeda, Janssen, and Pfizer. A.B.S.: research grants from Takeda. S.A.: received consulting and advisory fees from Abbvie, MSD, Takeda, Mundipharma, Recordati, Ferring, and Zambon. P.M.: consultancy/lecture fees or research support from Abbvie, Allergan, Ferring, Janssen-Cilag, MSD, Shire, Tillotts Pharma, and Takeda. L.P.B.: honoraria from Merck, Abbvie, Janssen, Genentech, Mitsubishi, Ferring, Norgine, Tillots, Vifor, Hospira/Pfizer, Celltrion, Takeda, Biogaran, Boehringer-Ingelheim, Lilly, HAC-Pharma, Index Pharmaceuticals, Amgen, Sandoz, Forward Pharma GmbH, Celgene, Biogen, Lycera, and Samsung Bioepis. P.B.: educational grants from AbbVie; lecture fees/consultancy from AbbVie, Takeda, Hospira, Janssen, MSD, Mundipharma, Roche, Pfizer, and Dr Falk Benelux. M.A.: consulting fees from Nikkiso Europe; lecture fees from Janssen and Pfizer. T.R.: speaker and/or advisory board member for Abbvie, Astellas, Dr Falk, GSK, Hospira, Janssen, MSD, Novartis, Pfizer, and Takeda; unrestricted research grants from Abbvie. T.S.: financial support for research from Takeda; lecture fees from Abbvie, Ferring, Janssen-Cilag, Medac, MSD, and Tillotts Pharma; consultancy fees from Hospira, Janssen-Cilag, MSD, Pfizer, Takeda, and Tillotts Pharma. G.F.: consultant and advisory board member for MSD, AbbVie, Takeda, Janssen, Mundipharma, Sandoz, and Pfizer. S.B.H.: consulting and advisory board fees and/or research support from AbbVie, Pfizer, Ferring, MSD, Janssen, Takeda, and Celltrion. R.E.: consultancy/lecture fee from Medtronic/Given Imaging; consultancy fee from Abbvie and Takeda. A.A.: consultancy/lecture fees from Abbvie, Astra-Zeneca, Biogen, Celltrion, Chiesi, Ferring, Hospira, Janssen, Lilly, MSD, Mitsubishi-Tanabe, Mundipharma, Nikkiso, Pfizer, Samsung, Sofar, Takeda, Tigenix, and Zambon; research grant from MSD. B.S.: research support from Pfizer; consulting and advisory fees from Janssen, MSD, Abbvie, Takeda, and Hospira; lecture fees from Abbvie, Falk, Ferring, MSD, Merck, and Takeda. D.C.B.: consulting fees and/or institutional grants and/or support for scientific meetings from Abbott Laboratories, Abbvie, Astellas, Boehringer Ingelheim, Bristol Myers Squibb (BMS), CSL, Behring, Celgene, Centocor, Elan Biogen, Ferring, Forward Pharma, Dr. Falk, Ferring, Genentech, GSK, Gilead, Hitachi, Index Pharma, Immundiagnostik, Janssen, Johnson & Johnson, Nestlé, Novartis, Merck, MSD, Otsuka, Ocera, Otsuka, Parexel, PDL, Pfizer, Procter & Gamble, Prometheus, Roche, Recordati, Schering-Plough, Takeda, TiGenix, UCB, Vifor, and 4DPharma. N.M.: consulting or advisory board fees from Abbvie, Janssen, Takeda, and MBcure. C.M.: consulting, lecturing, and/or advisory board fees and/or research support from AbbVie, Falk Foundation, Ferring, MSD, Janssen, and Takeda. G.M.: speaker and/or advisory board member for AbbVie, Angelini, MSD, Astellas, Celgene, Danone, Falk Pharma, Ferring, Hospira, Janssen, Omega Pharma, Otsuka, Pharmacosmos, Pfizer, Sandoz, and Takeda; consultant for MSD and Takeda; research grants in the last 5 years from Menarini, AbbVie, MSD, and Pharmathen. H.Y.: consulting and advisory fees from AbbVie, Janssen, and Takeda. I.D.: consulting and advisory board fees and/or research support from AbbVie, Janssen, Takeda, Pfizer, Ferring, MSD, Genentech, Given Imaging, Protalix, Falk Pharma, and Roche. M.F.: financial support for research from Takeda; lecture fees from Tillotts, Ferring, Boehringer-Ingelheim,

**Background:** Vedolizumab (VDZ) is effective for treatment of ulcerative colitis (UC) and Crohn's disease (CD). In GEMINI trials, anti-tumor necrosis factor (anti-TNF)-naïve patients had a superior response compared with anti-TNF-exposed patients. In real-world experience (RWE), the number of included anti-TNF-naïve patients was low. We aimed to evaluate the effectiveness and safety of VDZ in anti-TNF-naïve patients in an RWE setting.

**Methods:** This retrospective multicenter European pooled cohort study included consecutive active anti-TNF-naïve IBD patients treated with VDZ. The primary end point was clinical response at week 14. Patients with follow-up beyond week 14 and those discontinuing VDZ at any time were included for maintenance outcomes analysis.

**Results:** Since January 2015, 184 anti-TNF-naïve patients from 23 centers initiated VDZ treatment (Crohn's disease [CD], 50; ulcerative colitis [UC], 134). In CD, 42/50 (82%) patients responded by week 14 and 32 (64%) were in clinical remission; 26/50 (52%) achieved corticosteroid-free remission (CSFR). At last follow-up (44 weeks; interquartile range [IQR], 30–52 weeks), 27/35 (77.1%) patients with available data responded to treatment; 24/35 (68.6%) were in clinical remission, 21/35 (60%) were in CSFR. For UC, 116/134 (79.1%) responded to treatment by week 14, including 53 (39.5%) in clinical remission; 49/134 (36.6%) achieved CSFR. At last follow-up (42.5 weeks; IQR, 30–52 weeks), 79/103 (76.7%) patients responded to treatment, 69/103 (67.0%) were in remission, and 61/103 (59.2%) were in CSFR. Adverse effects were reported in 20 (11%) of the patients, leading to treatment discontinuation in 6 (3.3%).

**Conclusions:** VDZ is similarly effective in anti-TNF-naïve CD and UC patients. The efficacy is higher than reported in anti-TNF-experienced patients and is comparable to that of anti-TNF biologics in this population.

**Key Words:** vedolizumab, Crohn's disease, ulcerative colitis, anti-TNF-naïve

## INTRODUCTION

Vedolizumab (VDZ) is a humanized monoclonal antibody that targets the alpha 4 beta 7 integrin, characteristically expressed by gut-homing lymphocytes and recognized by mucosal vascular addressin cell adhesion molecule 1 (MAdCAM1) on endothelial cells. VDZ decreases gut inflammation by limiting lymphocyte recruitment from the blood to the intestinal lamina propria. The efficacy of VDZ in patients with Crohn's disease (CD) and ulcerative colitis (UC) was demonstrated in the GEMINI trials.<sup>1–4</sup> In the GEMINI I study (UC), VDZ was more effective in anti-tumor necrosis factor (TNF)-naïve patients in comparison with anti-TNF-experienced patients at both week 6 (53.1% and 26.3%, respectively;  $P < 0.05$ ) and week 52 (39.0% and 20.6%;  $P < 0.05$ ).<sup>5</sup> In CD trials, the remission rates in VDZ arms were significantly higher compared with placebo in the GEMINI II study, which included a mix of anti-TNF-experienced and -naïve patients; however, in the GEMINI III study, which included only patients who failed anti-TNF treatment, the difference was significant only at week 10 and not week 6 (defined as the primary outcome).<sup>3,4</sup> Overall, the rate of remission in both CD studies was numerically higher in anti-TNF-naïve CD patients at week 6 (22.7 vs 13.3%, respectively), and also at week 52 (48.9% vs 27.7% in week 6 responders).<sup>6</sup>

Since the approval of VDZ by regulatory authorities, several real-world cohort studies describing the effectiveness and safety of VDZ, enrolling more than 1500 patients, have been published.<sup>7–15</sup> The effectiveness of VDZ in CD varied between 37% and 64% for response and 24% and 42% for remission at week 14, respectively; for UC, the rates of response and remission were 37%–57% and 24%–26%, respectively.<sup>16</sup> However, more than 90% of the patients included in these studies had previously failed at least 1, and in most cases 2, anti-TNF agents.<sup>7,8,11–14,17–19</sup> Therefore, the aim of our study was to evaluate the effectiveness and safety of VDZ as induction and maintenance treatment in a real-world cohort of anti-TNF-naïve patients with inflammatory bowel disease (IBD).

## METHODS

We performed a retrospective, observational pooled European multicenter study aiming to assess the effectiveness and safety of VDZ in anti-TNF-naïve patients with CD and UC. The study protocol was reviewed and approved by the Clinical Research Committee (ClinCom) of the European Crohn's and Colitis Organization (ECCO). The study call was advertised to all ECCO members. Only ECCO members who

Janssen, Chiesi, Falk, Pfizer, Zeria, Mitsubishi, MSD, Takeda, and Abbvie; consultancy for Abbvie, Ferring, MSD, Pfizer, Boehringer-Ingelheim, and Janssen. The other authors had no conflicts of interest to disclose. Takeda had no role in the design or conduct of the study, analysis of the data, or interpretation of the results.

Supported by: No funding was obtained for the study.

Author contributions: Uri Kopylov is the guarantor of the study. Uri Kopylov: study design, data collection and analysis, drafting of the manuscript. Bram Verstockt, Luc Biedermann, Shaji Sebastian, Daniela Pugliese, Elena Sonnenberg, Peter Steinhagen, Naila Arebi, Yulia Ron, Torsten Kucharzik, Xavier Roblin, Bella Ungar, Ariella Bar-Gil Shitrit, Sandro Ardizzone, Pauliina Molander, Marina Coletta, Laurent Peyrin-Biroulet, Peter Bossuyt, Irit Avni- Biron, Emmanouela Tsoukali, Mariangela Allocca, Konstantinos Katzanos, Tim Raine, Taina Sipponen, Gionata Fiorino, Shomron Ben-Horin, Rami Eliakim, Alessandro Armuzzi, Britta Siegmund, Daniel C. Baumgart, Nikolaos Kamperidis, Nitsan Maharshak, Christian Maaser, Gerassimos Mantzaris, Henit Yanai, Dimitrios K. Christodoulou, Iris Dotan: data collection, critical revision of the manuscript. Marc Ferrante: study design, critical revision of the manuscript. All authors collected the data. U.K. conceived the study and wrote the manuscript. All authors approved the final version of the manuscript.

Address correspondence to: Uri Kopylov, MD, Department of Gastroenterology, Sheba Medical Center, Sheba Road 2, 52960 Ramat Gan, Israel ([ukopylov@gmail.com](mailto:ukopylov@gmail.com)).

© 2018 Crohn's & Colitis Foundation. Published by Oxford University Press. All rights reserved. For permissions, please e-mail: [journals.permissions@oup.com](mailto:journals.permissions@oup.com).

doi: 10.1093/ibd/izy155

Published online 18 May 2018

could provide a complete list of anti-TNF-naïve IBD patients who had started vedolizumab were eligible to participate.

### Inclusion Criteria

All anti-TNF-naïve adult IBD patients with active disease who received at least 1 infusion of VDZ and were followed for at least 14 weeks were eligible for inclusion. Active disease was defined as any of the following: for CD: Harvey Bradshaw Index (HBI) >4, Crohn's disease activity index (CDAI) >150; for UC: Lichtiger score >4; simple clinical colitis activity index (SCCAI) >2, partial Mayo score  $\geq$ 2. We assessed the clinical, laboratory, and endoscopic characteristics at baseline, week 14, week 30, and week 52.

### Vedolizumab Dosing

VDZ was administered intravenously at a standard dosing regimen (300 mg at weeks 0, 2, and 6, followed by q8w maintenance dosing). Some of the participating centers administered an additional VDZ dose of 300 mg at week 10 in CD patients as standard practice. In addition, the interval between VDZ infusions could be shortened (to q4/q6 weeks) in some of the patients with primary or secondary nonresponse, per discretion of the treating physician and local reimbursement guidelines or availability of a medical need program.

### Study Definitions

The clinical, endoscopic, and laboratory data for each timepoint were extracted from the patients' clinical charts and electronic records. As this was a retrospective multicenter study, there was a need to combine several clinical scores into a single clinical severity model. Baseline clinical severity was defined as follows: 0: clinical remission; 1: mild disease; 2: moderate disease; 3: severe disease using the appropriate definitions for each clinical score (Supplementary Table 1). Clinical severity was reassessed at week 14, week 30, and week 52 in patients reaching those time points, per availability. Clinical response was defined as an improvement of at least 1 severity score category. Clinical remission for CD was defined as HBI  $\leq$ 4, CDAI <150; for UC: Lichtiger score <4; SCCAI <2, partial Mayo score  $\leq$ 1. Steroid-free remission was defined as clinical remission without systemic corticosteroid treatment. The authors did not request the individual components of the clinical scores from the investigators and used the reported calculated values. In absence of clinical scores, Physician's Global Assessment (PGA) could be used, provided that in the presence of bloody stools, the patient was regarded as nonresponse.

Induction outcomes were calculated at week 14. Maintenance outcomes were established per the last follow-up after week 14 (the latest of week 30/52); if the patient continued treatment after week 14 but no data for remote time points were available, we excluded that patient from the analysis of maintenance outcomes.

Secondary loss of response (LOR) was defined as clinical exacerbation after initial clinical response achieved by week 14 (induction). Need for surgery and initiation of corticosteroids or immunomodulators during the course of treatment were also considered loss of response. Dose adjustments for VDZ were not considered loss of response as long as other definitions of secondary loss of response were not met and the patient maintained clinical response at the next time point. Dose escalation was defined as a shortening of duration between VDZ infusions to less than 8 weeks; administration of a single additional dose at week 10 (available in some jurisdictions) was not considered dose escalation if the patient continued to receive VDZ q8w from week 14 onwards.

Endoscopic activity was assessed for UC using the endoscopic Mayo subscore. Mucosal healing was defined as an endoscopic Mayo score of 0 or 1; endoscopic response was defined as a drop of at least 1 point in the endoscopic Mayo subscore. For CD, we used the following scale; for baseline evaluation: 0, absence of ulcerations (mucosal healing); 1, presence of ulcerations; for follow-up endoscopy: mucosal healing was defined as the absence of ulcerations at follow-up endoscopy in patients who had ulcerations at baseline ileocolonoscopy; endoscopic response was defined as clear endoscopic improvement but with detectable ulcerations.<sup>20</sup>

Concomitant immunomodulator therapy was defined as co-treatment with a thiopurine or methotrexate during the induction of VDZ therapy.

### Study Outcomes

Primary outcome was defined as clinical response at week 14. Main secondary outcomes included the following: clinical remission by week 14; steroid-free clinical remission at week 14; C-reactive protein (CRP) normalization at week 14 in patients with elevated baseline CRP; clinical response, remission, steroid-free remission at the last follow-up; secondary loss of response; endoscopic response; and mucosal healing.

### Safety Events

Adverse events were recorded, and safety data are reported from the safety population (patients who received at least 1 dose of vedolizumab). The results are expressed using Medical Dictionary of Regulatory Activities (MedDRA) 18.1 terminology.<sup>21</sup>

### Statistical Analysis

Descriptive statistics are presented as means  $\pm$  standard deviations for parametric variables and medians with interquartile ranges (IQRs) for nonparametric continuous variables, and percentages for categorical variables. Categorical variables were analyzed by chi-square/Fisher exact test and continuous variables by *t* test/Mann-Whitney test, as appropriate. A 2-tailed *P* value <0.05 was considered statistically significant.

We constructed a multivariate logistic regression model to identify the independent predictors of week 14 response. Variables with significance level <0.1 on univariate analysis were included in the multivariate model. To investigate the effect of the variables on VDZ discontinuation, we performed a survival analysis using a Cox multivariate proportional hazard model. The model included variables with a significance level <0.1 on univariate analysis. The analysis was performed using IBM SPSS (version 20.0; Armonk, NY, USA).

## RESULTS

### Study Population

A total of 184 consecutive IBD patients (CD: 50, 27.2%; UC: 134, 72.8%) from 23 centers in 9 countries (Belgium, Finland, France, Greece, Germany, Italy, Israel, Switzerland, United Kingdom) who initiated VDZ treatment between January 2015 and March 2017 were included. The median duration of follow-up (IQR) was 30 (14–48) weeks. The clinical and demographic characteristics of the included patients are detailed in Tables 1 and 2. Eighty (43.4%) patients had a relative contraindication to anti-TNF therapy or a safety concern that led to selection of a non-anti-TNF biologic agent (35 [19%]: history of malignancy or premalignant condition; 5 [2.7%]:

**TABLE 1: Clinical Characteristics of the Included Crohn’s Disease Patients**

| Characteristic                                           | n = 50     |
|----------------------------------------------------------|------------|
| Median (IQR) age, y                                      | 49 (33–67) |
| Median (IQR) age at disease onset, y                     | 32 (23–50) |
| Sex                                                      |            |
| Male, No. (%)                                            | 27 (54)    |
| Female, No. (%)                                          | 23 (46)    |
| CD location                                              |            |
| Ileal, No. (%)                                           | 14 (28)    |
| Colonic, No. (%)                                         | 12 (24)    |
| Ileocolonic, No. (%)                                     | 24 (48)    |
| CD behavior                                              |            |
| Nonstricturing nonpenetrating, No. (%)                   | 32 (64)    |
| Structuring, No. (%)                                     | 12 (24)    |
| Penetrating, No. (%)                                     | 6 (12)     |
| Perianal disease, No. (%)                                | 6 (12)     |
| Prior surgery for Crohn’s disease, No. (%)               | 18 (36)    |
| Smoking status                                           |            |
| Never, No. (%)                                           | 29 (58)    |
| Current, No. (%)                                         | 6 (12)     |
| Past, No. (%)                                            | 15 (30)    |
| Disease severity                                         |            |
| Mild, No. (%)                                            | 19 (38)    |
| Moderate, No. (%)                                        | 21 (42)    |
| Severe, No. (%)                                          | 10 (20)    |
| Elevated CRP, No. (%)                                    | 30/47 (67) |
| Systemic corticosteroids at treatment onset, No. (%)     | 18 (36)    |
| Concomitant immunomodulators at treatment onset, No. (%) | 7 (10.5)   |

latent tuberculosis or history of active tuberculosis; 10 [5.4%]; other major infections in the past under immunosuppressive treatment; 7 [3.8%]; history of demyelinating disease; 10 [5.4%]; advanced age; 12 [5.4%]; congestive heart failure or ischemic heart disease, 1 [0.5%]; severe chronic obstructive pulmonary disease). The study flow is described in Figure 1. Baseline clinical scores were available for all patients, week 14 clinical scores for 175/184 (95.4%) and at last follow-up for 132/138 (95.6%) patients (PGA was used for the remaining patients).

### Clinical Outcomes

#### Crohn’s disease

**Induction outcomes.** Forty-two (84%) patients responded by week 14, and 32 (64%) were in clinical remission; 26/50 (52%) achieved corticosteroid-free remission, including 7/18 (38.9%) patients treated with systemic corticosteroids at baseline (Fig. 2). An additional week 10 dose was administered in 22 (44%) patients. The response rate by week 14 in patients who received an additional week 10 dose was 21/22 (94.5%) vs 21/28 (75%; *P* = 0.064).

CRP values at weeks 0 and 14 were available for 36 patients and normalized in 9/26 (36.1%) patients with elevated baseline CRP levels. None of the clinical or demographic parameters were significantly associated with the likelihood of response (Table 3).

**TABLE 2: Clinical Characteristics of the Included Ulcerative Colitis Patients**

| Characteristic                                           | n = 134    |
|----------------------------------------------------------|------------|
| Median (IQR) age, y                                      | 45 (34–63) |
| Median (IQR) age at disease onset, y                     | 34 (26–53) |
| Sex                                                      |            |
| Male, No. (%)                                            | 73 (54.5)  |
| Female, No. (%)                                          | 61 (45.5)  |
| UC location                                              |            |
| Rectum, No. (%)                                          | 8 (6)      |
| Left-sided, No. (%)                                      | 42 (31.6)  |
| Extensive, No. (%)                                       | 83 (62.4)  |
| Smoking status                                           |            |
| Never, No. (%)                                           | 94 (70.1)  |
| Current, No. (%)                                         | 5 (3.7)    |
| Past, No. (%)                                            | 35 (26.1)  |
| Disease severity                                         |            |
| Mild, No. (%)                                            | 43 (32.1)  |
| Moderate, No. (%)                                        | 71 (53.0)  |
| Severe, No. (%)                                          | 20 (14.9)  |
| Elevated CRP, No. (%)                                    | 72 (56.3)  |
| Median (IQR) CRP, mg/L                                   | ...        |
| Systemic corticosteroids at treatment onset, No. (%)     | 63 (47)    |
| Concomitant immunomodulators at treatment onset, No. (%) | 33 (23.9)  |

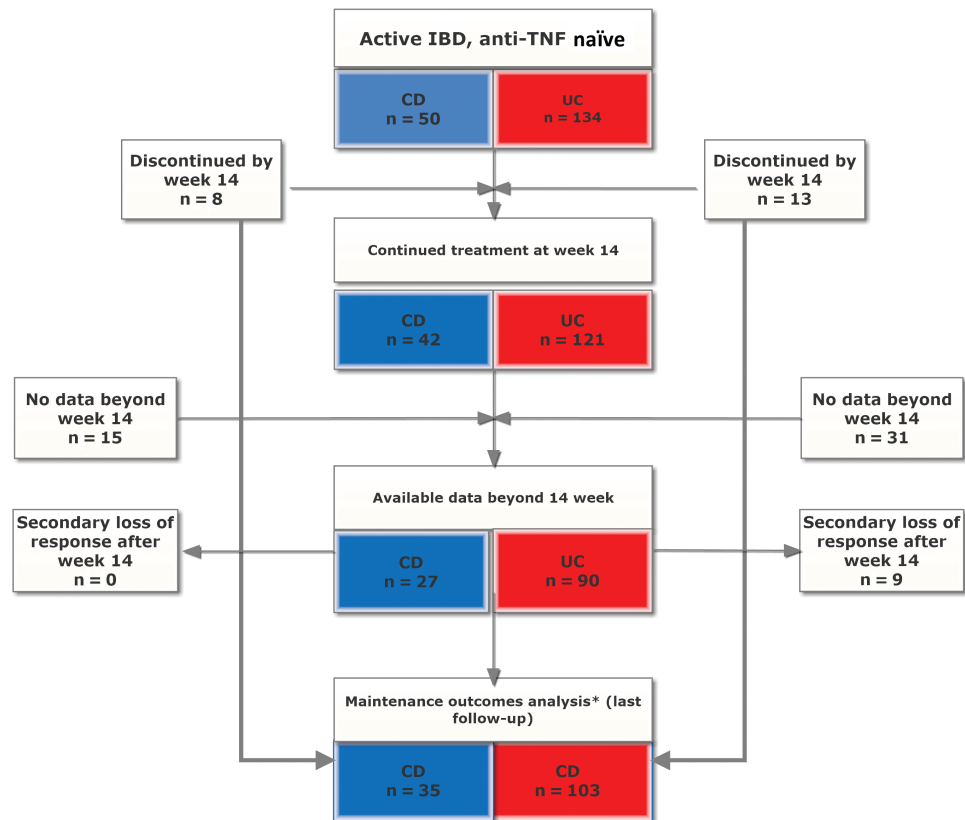

FIGURE 1. Study flow.

VDZ was continued in 42/50 (86%) patients after week 14. Treatment was discontinued in 8 patients (6 primary failure, 2 due to adverse events [1 arthralgia and 1 neutropenia]).

**Maintenance outcomes.** Maintenance data were available for 35/50 (70%) patients (median duration of follow-up [IQR], 44 [30–52] weeks). At last follow-up, 27/35 (77.1%) responded to treatment; 24/35 (68.6%) were in clinical remission; 21/35 (60%) were in corticosteroid-free remission, including 9/13 (69.2%) patients on baseline corticosteroids. CRP levels were available in 26 patients and were normal in 17 (65.4%); CRP normalized in 3/10 (30%) patients with elevated baseline and available last follow-up CRP levels. VDZ was discontinued in 2 patients due to adverse events (relapse of sarcoidosis and arthralgia) at week 30. All other patients continued treatment at last follow-up. Two patients received escalated VDZ dosing starting with week 10 (q4w); both continued VDZ at their last follow-up. Overall, VDZ was discontinued in 10/50 (20%) CD patients.

**Ulcerative colitis.** One hundred thirty-four patients were included. One hundred and six patients (79.1%) responded to treatment by week 14, including 53 patients (39.5%) in clinical remission. Steroid-free remission was achieved in 49/134 (36.6%) patients, including 20/63 (31.7%) patients on corticosteroids at baseline.

CRP values at weeks 0 and 14 were available for 122 patients, and they normalized in 32/72 (44.4%) of those with an elevated CRP at baseline. The only clinical parameter significantly associated with the likelihood of response at week 14 was baseline disease severity (Table 4).

VDZ was continued in 121/134 (90.3%) after week 14. Treatment was discontinued in 13 patients for primary nonresponse (n = 9), adverse events (n = 2, tinnitus and cholestasis, respectively), or administrative reasons (n = 1). One patient (82 years old with a history of ischemic and valvular heart disease) died from acute myocardial infarction that was deemed unrelated to therapy 18 weeks after his first VDZ infusion; week 14 outcome was not documented. An additional patient (89 years old with preexisting ischemic and valvular heart disease) died from exacerbation of ischemic heart disease deemed unrelated to treatment.

Maintenance data were available for 103/134 (median duration of follow-up [IQR], 42.5 [30–52] weeks); 103 patients were included for analysis of maintenance outcomes. At last follow-up, 79 (76.7%) patients responded to treatment, 69 (67.0%) were in remission; 61 (59.2%) were in corticosteroid-free remission, including 25/48 (52.1%) patients on corticosteroids at baseline. CRP was normal in 61/91 (67%) patients with available CRP levels at last follow-up, including 29/53

**TABLE 3: Clinical Variables Associated With Clinical Response at Week 14, Crohn’s Disease**

| Characteristic                                  | Nonresponse (n = 8), No. (%) | Response (n = 42), No. (%) | P    |
|-------------------------------------------------|------------------------------|----------------------------|------|
| Sex                                             |                              |                            |      |
| Male                                            | 6 (75)                       | 21 (50)                    | 0.7  |
| Female                                          | 2 (25)                       | 21 (50)                    |      |
| CD location                                     |                              |                            | 0.15 |
| Ileal                                           | 0 (0.0)                      | 14 (33.3)                  |      |
| Colonic                                         | 3 (37.5)                     | 9 (21.4)                   |      |
| Ileocolonic                                     | 5 (62.5)                     | 19 (45.2)                  |      |
| CD behavior                                     |                              |                            | 0.47 |
| Nonstricturing nonpenetrating                   | 4 (50.0)                     | 27 (65.9)                  |      |
| Stricturing                                     | 2 (25.0)                     | 10 (24.4)                  |      |
| Penetrating                                     | 2 (25.0)                     | 4 (9.8)                    |      |
| Perianal disease                                | 2 (25.0)                     | 4 (9.8)                    | 0.22 |
| Prior surgery for Crohn’s disease               | 2 (25.0)                     | 38 (90.5)                  | 0.42 |
| Smoking status                                  |                              |                            | 0.86 |
| Never                                           | 4 (50.0)                     | 25 (59.5)                  |      |
| Current                                         | 1 (12.5)                     | 5 (11.9)                   |      |
| Past                                            | 3 (37.5)                     | 12 (28.6)                  |      |
| Disease severity                                |                              |                            | 0.52 |
| Mild                                            | 2 (25.0)                     | 16 (38.1)                  |      |
| Moderate                                        | 5 (62.5)                     | 17 (40.5)                  |      |
| Severe                                          | 1 (12.5)                     | 9 (21.4)                   |      |
| Active ulcerations on endoscopy                 | 4/5 (80.0)                   | 28 (96.6)                  | 0.15 |
| Elevated CRP                                    | 6 (75.0)                     | 24 (61.5)                  | 0.47 |
| Systemic corticosteroids at treatment onset     | 2 (25.0)                     | 16 (38.1)                  | 0.48 |
| Concomitant immunomodulators at treatment onset | 1 (12.5)                     | 4 (9.5)                    | 0.81 |
| Additional week 10 VDZ dose                     | 1 (12.5)                     | 21 (50)                    | 0.06 |

**TABLE 4: Clinical Variables Associated With Clinical Response at Week 14, Ulcerative Colitis**

| Characteristic                                  | Nonresponse (n = 28), No. (%) | Response (n = 106), No. (%) | P    |
|-------------------------------------------------|-------------------------------|-----------------------------|------|
| Sex                                             |                               |                             |      |
| Male                                            | 15 (53.6)                     | 58 (54.7)                   | 1.00 |
| Female                                          | 13 (46.4)                     | 48 (45.3)                   |      |
| UC location                                     |                               |                             | 0.55 |
| Rectum                                          | 1 (3.6)                       | 7 (6.7)                     |      |
| Left-sided                                      | 11 (39.3)                     | 32 (29.5)                   |      |
| Extensive                                       | 16 (57.1)                     | 67 (63.8)                   |      |
| Smoking status                                  |                               |                             | 0.27 |
| Never                                           | 23 (82.1)                     | 71 (67.0)                   |      |
| Current                                         | 0 (0.0)                       | 5 (4.7)                     |      |
| Past                                            | 5 (17.9)                      | 30 (28.3)                   |      |
| Disease severity                                |                               |                             | 0.02 |
| Mild                                            | 15 (53.6)                     | 28 (26.4)                   |      |
| Moderate                                        | 11 (39.3)                     | 60 (56.6)                   |      |
| Severe                                          | 2 (7.1)                       | 18 (17.0)                   |      |
| Mayo subscore on index endoscopy                |                               |                             | 0.46 |
| 0                                               | 0 (0.0)                       | 2 (2.1)                     |      |
| 1                                               | 0 (0.0)                       | 6 (6.2)                     |      |
| 2                                               | 11 (55)                       | 39 (40.6)                   |      |
| 3                                               | 9 (45)                        | 49 (51.4)                   |      |
| Elevated CRP                                    | 16 (64.0)                     | 56 (54.4)                   | 0.38 |
| Systemic corticosteroids at treatment onset     | 13 (46.4)                     | 50 (47.2)                   | 0.94 |
| Concomitant immunomodulators at treatment onset | 6 (21.5)                      | 26 (24.5)                   | 0.52 |
| Additional week 10 VDZ dose                     | 0 (0)                         | 11 (10.4)                   | 0.12 |

Downloaded from https://academic.oup.com/ibdjournal/article/24/11/2442/4993380 by guest on 19 April 2024

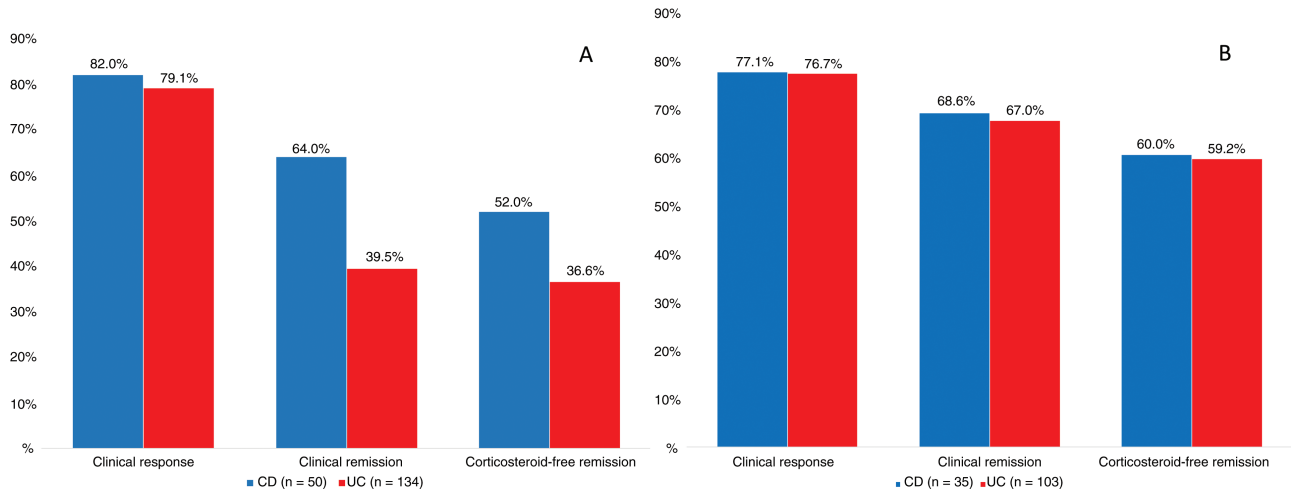

FIGURE 2. Efficacy of vedolizumab in Crohn's disease and ulcerative colitis. A, Week 14. B, Last follow-up.

(54.7%) patients with elevated baseline CRP. Treatment was discontinued in 9 (8.7%) after week 14 (median time to discontinuation [IQR], 30 [20–39] weeks). Seventy out of 90 patients (18.9%) were receiving escalated VDZ dosing after week 14 (15, q4w; 2, q6w). Among patients who continued treatment and had available follow-up data beyond week 14, secondary loss of response was developed in 9/90 (10%). Four patients responded to dose escalation (infusion every 4 weeks), and treatment was discontinued in 5 additional patients. Overall, VDZ was discontinued in 18/124 (14.5%) patients for the entire duration of follow-up.

On Cox proportional hazard analysis, the only variable that was correlated with drug discontinuation was disease

severity >1 at week 14 (hazard ratio [HR], 0.12, 95% CI, 0.26–0.69,  $P = 0.009$ ) (Fig. 3A) Dose escalation was not significantly associated with the risk of VDZ discontinuation (HR, 50.1; 95% CI, 0.3–82;  $P = 0.15$ )

The overall drug discontinuation rates for UC and CD did not differ significantly ( $P = 0.33$ ) and are depicted in Figure 3B.

### Endoscopic Outcomes

#### Crohn's disease

Baseline endoscopy was available for 34/50 (68%) patients (median [IQR], 4.5 [2–9] weeks before treatment onset) and demonstrated active ulcerations in all. Follow-up

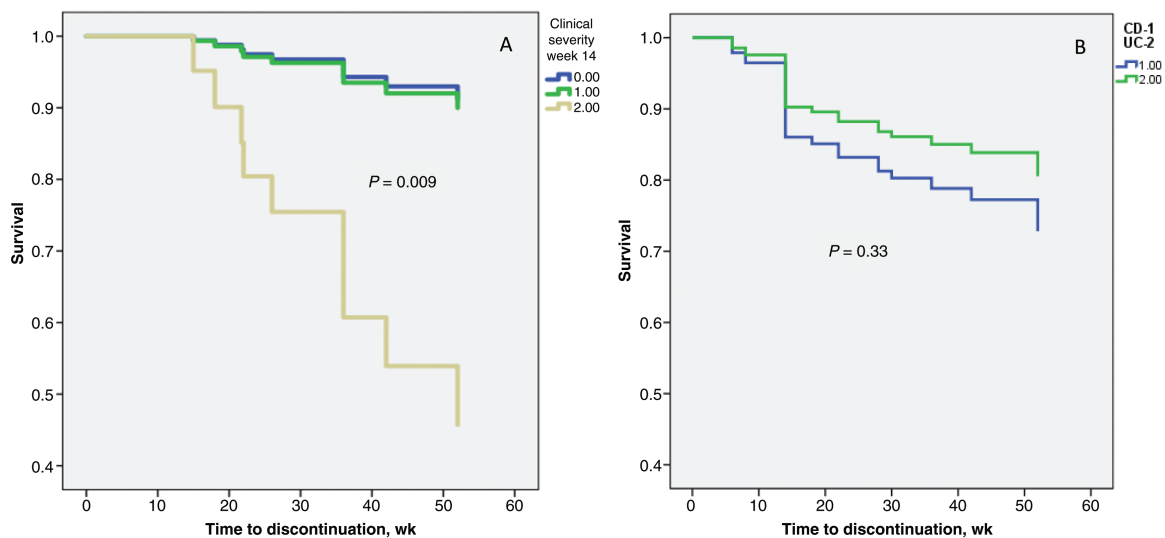

FIGURE 3. Survival analysis for discontinuation of vedolizumab. A, Cox proportional hazard analysis for vedolizumab discontinuation after week 14 (UC; clinical remission; 1: mild severity; 2: moderate severity). B, Cox proportional hazard analysis for vedolizumab discontinuation for the duration of the treatment (CD and UC).

endoscopy was available in 11 patients after 26 (IQR, 14–32) weeks. Endoscopic improvement was achieved in 8/11 (63.7%) patients with available data; mucosal healing was achieved in 5/11 (45.5%) patients.

### Ulcerative colitis

Endoscopic Mayo subscore >1 was detected in 108 patients at baseline endoscopy (1 week before treatment onset; IQR, 1–5 weeks). A follow-up endoscopy (performed after 14 weeks from initiation of treatment; IQR, 10–23 weeks) was available in 55 (51%) patients with active ulcerations at baseline. Mucosal healing was achieved in 31 (58.5%) patients.

### Safety

The adverse events that were documented during the entire follow-up period are listed in Table 5. Overall, 20 (11%) patients reported adverse events. VDZ was discontinued in 6 patients (2 arthralgia, 1 neutropenia, 1 sarcoidosis flare-up, 1 tinnitus, 1 cholestasis). Two CD patients required surgical intervention (1 ileocolonic resection, 1 perianal abscess drainage); 5 UC patients underwent total colectomy, and 1 required liver transplantation for known PSC. Two patients with preexisting severe heart disease died.

## DISCUSSION

This large multicenter study demonstrates the effectiveness of vedolizumab as a firstline biologic in IBD in a real-world setting. At week 14, 82% of CD and 79.1% of UC anti-TNF-naïve patients responded to treatment. At last follow-up, 77.1% of CD and 76.7% of UC patients responded to VDZ. In the GEMINI studies, VDZ seemed to be substantially more effective in both UC and CD in anti-TNF-naïve patients compared with patients who previously failed anti-TNFs. Since the approval of VDZ, several real-world experience (RWE) series with VDZ have been published, demonstrating response

rates of 37%–64% for CD and 37%–57% for UC at week 14, respectively. However, the number of anti-TNF-naïve patients in these studies was quite small (<10%), and as a consequence, none of them addressed anti-TNF-naïve patients as a separate subgroup. Moreover, VDZ was a third biologic in most of these patients. Although our study was not comparative (we excluded anti-TNF-experienced patients), it seems that the rates of response and remission are substantially higher in biologic-naïve patients in comparison with previous series. Similarly, RWE studies with anti-TNF biologics demonstrated decreasing effectiveness with each previous agent failure.<sup>22, 23</sup>

In recent RWE series, the response rate to infliximab for biologic-naïve patients approximated 89%,<sup>24, 25</sup> with sustained long-term response in >60%.<sup>26</sup> In UC, initial response was reported in 68%, and two-thirds of these experienced long-term benefit.<sup>27</sup> In CD, initial response to adalimumab was achieved in 89% of anti-TNF-naïve patients.<sup>25</sup> In a recent Spanish cohort study, adalimumab therapy was associated with a response rate of 61% in anti-TNF-naïve and 47% in anti-TNF-experienced UC patients.<sup>28</sup> For golimumab, response rates were 75% as first anti-TNF, 70% as second anti-TNF, and 50% as third anti-TNF.<sup>22</sup> Our results are well in line with the response rates of anti-TNF biologics in the biologic-naïve patients reported. Interestingly, even though VDZ was less effective in CD than UC in the GEMINI studies, particularly in anti-TNF failures, this is not the case in RWE studies, including the current one, where the response rates are quite similar.<sup>8, 10, 12, 13, 29</sup>

The rapidity of response to vedolizumab is still a matter of concern in the IBD community. However, a recent post hoc analysis from GEMINI 1 demonstrated that a substantial improvement in stool frequency and rectal bleeding can be detected as early as week 2 and is more robust at week 6; the effect was more solid in anti-TNF-naïve patients.<sup>30</sup> In recent real-world evidence studies that included <10% of anti-TNF-naïve patients, clinical response was achieved in up to 43%, and remission in up to 25% of UC patients by week 6.<sup>7–9, 11, 16</sup> In our

**TABLE 5: Adverse Effects During Vedolizumab Treatment Using MedDRA 18.1 Terminology**

| Preferred Term                       | System Organ/Class                              | CD | UC |
|--------------------------------------|-------------------------------------------------|----|----|
| Arthralgia                           | Musculoskeletal and connective tissue disorders | 2  | 4  |
| Nasopharyngitis                      | Infections and infestations                     | 2  | 1  |
| Headaches                            | Nervous system disorders                        |    | 2  |
| <i>Clostridium difficile</i> colitis | Infections and infestations                     |    | 1  |
| Cholestasis                          | Hepatic disorder                                |    | 1  |
| Herpes zoster                        | Infections and infestations                     |    | 1  |
| Neutropenia                          | Hematopoietic neutropenia                       | 1  |    |
| Pleurisy                             | Pleural infections and inflammations            |    | 1  |
| Pneumonia                            | Infections and infestations                     | 1  |    |
| Sarcoidosis flare-up                 | Interstitial lung disease                       | 1  |    |
| Tinnitus                             | Hearing impairment                              |    | 1  |



study, we were not able to access the rapidity of response due to the limitations of the study format.

Generally, the efficacy in retrospective RWE series seems to be higher than in corresponding randomized controlled studies. The main reasons for that include less stringent definitions of response and remission (such as utilization of PGA instead of clinical scores), missing laboratory and endoscopic data, and in some cases persistence of not clearly beneficial treatment in the face of a lack of alternatives (with some patients indeed benefitting from the treatment at a later phase). We tried to avoid those pitfalls by using validated clinical scores as much as possible (in more than 95% of our patients); CRP levels were available for at least 70% of the patients at week 14.

In addition, RWE studies commonly utilize more remote time points to define response and remission. In the GEMINI studies, response and remission were evaluated at week 6 (in GEMINI II, also at week 10 as a secondary outcome), whereas most RWE series including ours extended the duration until week 14. Currently, there is no clear definition as to what constitutes primary nonresponse to biologics; for practical matters, it is pertinent to evaluate the response after completion of full induction for anti-TNF agents.<sup>31</sup> With the mostly similar dosing schedules for VDZ and infliximab, we applied the same definition in our study as well.

The safety profile of VDZ in our study was very favorable and consistent with the data from randomized controlled trials and other RWE series. Only 3.3% of the patients in our study had to discontinue treatment due to adverse effects. No new safety signals were identified in this multicenter cohort.

Our study has several limitations, mostly attributed to its retrospective multicenter design. In such setting, we can expect significant heterogeneity in treatment strategies and patient management and assessment policy; moreover, endoscopic and laboratory data were not universally available. Minor adverse events could have been underreported due to a potential recall bias. These limitations are not unique to our study and are similar to all multicenter RWE series. An additional limitation is the noncomparative design of our study; we did not include anti-TNF-experienced patients to avoid reproduction of RWE series that provided a multitude of data on these patients. We also did not include comparator arms of patients treated with other biologics. In addition, vedolizumab levels were not available to most of the centers in our study. Lack of data pertaining to response of extraintestinal manifestations to VDZ is another limitation of this study.

Our results suggest that vedolizumab is at least as effective and safe as anti-TNF biologics in biologic-naïve patients and that it can be used very effectively in these patients. The possibly slower onset of the effect is a potential drawback; however, this was not explored in the current study. The efficacy seems to be diminished in anti-TNF-exposed patients; however, this is not unique to VDZ, and a similar trend can be detected with all biologics. As vedolizumab is a relatively new drug, it is still mostly used in patients who previously failed anti-TNF

biologics; nevertheless, the excellent safety profile and at least comparable efficacy challenge this predisposition.

With the recent addition of ustekinumab and the pending dawn of the era of small molecules, our therapeutic arsenal in IBD is rapidly expanding. One of the major challenges of the coming years is the creation of an individualized treatment approach using integrative models that utilize clinical pharmacological, genetic, serologic, and microbial data to predict susceptibility to targeting of specific molecular pathways and medications. Such studies, which are urgently needed, are likely to override our current treatment paradigm and provide individualized treatment algorithms for our patients.

## SUPPLEMENTARY DATA

Supplementary data are available at *Inflammatory Bowel Diseases* online.

## ACKNOWLEDGMENTS

The authors would like to thank the European Crohn's and Colitis Organization (ECCO) and the clinical committee of ECCO for their help in reviewing and improving the quality of the project.

## REFERENCES

1. Parikh A, Fox I, Leach T, et al. Long-term clinical experience with vedolizumab in patients with inflammatory bowel disease. *Inflamm Bowel Dis*. 2013;19:1691–1699.
2. Lam MC, Bressler B. Vedolizumab for ulcerative colitis and Crohn's disease: results and implications of GEMINI studies. *Immunotherapy*. 2014;6:963–971.
3. Sandborn WJ, Feagan BG, Rutgeerts P, et al; GEMINI 2 Study Group. Vedolizumab as induction and maintenance therapy for Crohn's disease. *N Engl J Med*. 2013;369:711–721.
4. Sands BE, Feagan BG, Rutgeerts P, et al. Effects of vedolizumab induction therapy for patients with Crohn's disease in whom tumor necrosis factor antagonist treatment failed. *Gastroenterology*. 2014;147:618–627.e3.
5. Feagan BG, Rubin DT, Danese S, et al. Efficacy of vedolizumab induction and maintenance therapy in patients with ulcerative colitis, regardless of prior exposure to tumor necrosis factor antagonists. *Clin Gastroenterol Hepatol*. 2017;15:229–239.e5.
6. Sands BE, Sandborn WJ, Van Assche G, et al. Vedolizumab as induction and maintenance therapy for Crohn's disease in patients naïve to or who have failed tumor necrosis factor antagonist therapy. *Inflamm Bowel Dis*. 2017;23:97–106.
7. Shelton E, Allegretti JR, Stevens B, et al. Efficacy of vedolizumab as induction therapy in refractory IBD patients: a multicenter cohort. *Inflamm Bowel Dis*. 2015;21:2879–2885.
8. Williet N, Boschetti G, Fovet M, et al. Association between low trough levels of vedolizumab during induction therapy for inflammatory bowel diseases and need for additional doses within 6 months. *Clin Gastroenterol Hepatol*. 2017;15:1750–1757.e3.
9. Amiot A, Grimaud JC, Peyrin-Biroulet L, et al; Observatory on Efficacy and of Vedolizumab in Patients With Inflammatory Bowel Disease Study Group; Groupe d'Etude Therapeutique des Affections Inflammatoires du tube Digestif. Effectiveness and safety of vedolizumab induction therapy for patients with inflammatory bowel disease. *Clin Gastroenterol Hepatol*. 2016;14:1593–1601.e2.
10. Stallmach A, Langbein C, Atreya R, et al. Vedolizumab provides clinical benefit over 1 year in patients with active inflammatory bowel disease - a prospective multicenter observational study. *Aliment Pharmacol Ther*. 2016;44:1199–1212.
11. Baumgart DC, Bokemeyer B, Drabik A, et al; Vedolizumab Germany Consortium. Vedolizumab induction therapy for inflammatory bowel disease in clinical practice—a nationwide consecutive German cohort study. *Aliment Pharmacol Ther*. 2016;43:1090–1102.
12. Kopylov U, Ron Y, Avni-Biron I, et al. Efficacy and safety of vedolizumab for induction of remission in inflammatory bowel disease—the Israeli real-world experience. *Inflamm Bowel Dis*. 2017;23:404–408.
13. Vivio EE, Kanuri N, Gilbertsen JJ, et al. Vedolizumab effectiveness and safety over the first year of use in an IBD clinical practice. *J Crohns Colitis*. 2016;10:402–409.
14. Dulai PS, Singh S, Jiang X, et al. The real-world effectiveness and safety of vedolizumab for moderate-severe Crohn's disease: results from the US VICTORY consortium. *Am J Gastroenterol*. 2016;111:1147–1155.

15. Eriksson C, Marsal J, Bergemalm D, et al. Long-term effectiveness of vedolizumab in inflammatory bowel disease: a national study based on the Swedish National Quality Registry for Inflammatory Bowel Disease (SWIBREG). *Scand J Gastroenterol*. 2017;9:1–8.
16. Engel T, Ungar B, Yung DE, et al. Vedolizumab in IBD—lessons from real-world experience; a systematic review and pooled analysis. *J Crohns Colitis*. 2018;12:245–257.
17. Allegretti JR, Barnes EL, Stevens B, et al. Predictors of clinical response and remission at 1 year among a multicenter cohort of patients with inflammatory bowel disease treated with vedolizumab. *Dig Dis Sci*. 2017;62:1590–1596.
18. Eriksson C, Marsal J, Bergemalm D, et al; SWIBREG Vedolizumab Study Group. Long-term effectiveness of vedolizumab in inflammatory bowel disease: a national study based on the Swedish National Quality Registry for Inflammatory Bowel Disease (SWIBREG). *Scand J Gastroenterol*. 2017;52:722–729.
19. Stallmach A, Langbein C, Atreya R, et al. Vedolizumab provides clinical benefit over 1 year in patients with active inflammatory bowel disease - a prospective multicenter observational study. *Aliment Pharmacol Ther*. 2016;44:1199–1212.
20. Schnitzler F, Fidder H, Ferrante M, et al. Mucosal healing predicts long-term outcome of maintenance therapy with infliximab in Crohn's disease. *Inflamm Bowel Dis*. 2009;15:1295–1301.
21. Organization TMMaSS. *Medical Dictionary for Regulatory Activities (MedDRA)*. 2013.
22. Taxonera C, Rodríguez C, Bertolotti F, et al; Collaborators. Clinical outcomes of golimumab as first, second or third anti-TNF agent in patients with moderate-to-severe ulcerative colitis. *Inflamm Bowel Dis*. 2017;23:1394–1402.
23. Allez M, Vermeire S, Mozziconacci N, et al. The efficacy and safety of a third anti-TNF monoclonal antibody in Crohn's disease after failure of two other anti-TNF antibodies. *Aliment Pharmacol Ther*. 2010;31:92–101.
24. Schnitzler F, Fidder H, Ferrante M, et al. Long-term outcome of treatment with infliximab in 614 patients with Crohn's disease: results from a single-centre cohort. *Gut*. 2009;58:492–500.
25. Doecke JD, Hartnell F, Bampton P, et al; Australian and New Zealand Inflammatory Bowel Disease Consortium. Infliximab vs. adalimumab in Crohn's disease: results from 327 patients in an Australian and New Zealand observational cohort study. *Aliment Pharmacol Ther*. 2017;45:542–552.
26. Kestens C, van Oijen MG, Mulder CL, et al; Dutch Initiative on Crohn and Colitis (ICC). Adalimumab and infliximab are equally effective for Crohn's disease in patients not previously treated with anti-tumor necrosis factor- $\alpha$  agents. *Clin Gastroenterol Hepatol*. 2013;11:826–831.
27. Ferrante M, Vermeire S, Fidder H, et al. Long-term outcome after infliximab for refractory ulcerative colitis. *J Crohns Colitis*. 2008;2:219–225.
28. Iborra M, Pérez-Gisbert J, Bosca-Watts MM, et al; Spanish Working Group on Crohn's Disease and Ulcerative Colitis (GETECCU). Effectiveness of adalimumab for the treatment of ulcerative colitis in clinical practice: comparison between anti-tumor necrosis factor-naïve and non-naïve patients. *J Gastroenterol*. 2017;52:788–799.
29. Vermeire S, Loftus EV Jr, Colombel JF, et al. Long-term efficacy of vedolizumab for Crohn's disease. *J Crohns Colitis*. 2017;11:412–424.
30. Feagan B LK, Khalid JM, Cao C, et al. Vedolizumab demonstrates early symptomatic improvement in ulcerative colitis: a GEMINI 1 post hoc analysis. Paper presented at: United European Gastroenterology Week; October 2017; Barcelona, Spain.
31. Ben-Horin S, Chowers Y. Tailoring anti-TNF therapy in IBD: drug levels and disease activity. *Nat Rev Gastroenterol Hepatol*. 2014;11:243–255.
